# Supplementary material for: Rheological reversibility and long-term stability of repulsive and attractive nanoemulsion gels
Source: Royal Society of Chemistry journal article supplement (doi:10.1039/c7ra09605d), 2017-01-01
Supplement: c7ra09605d1.pdf [file c7ra09605d1.pdf]

## Supplementary Data

Figure S1

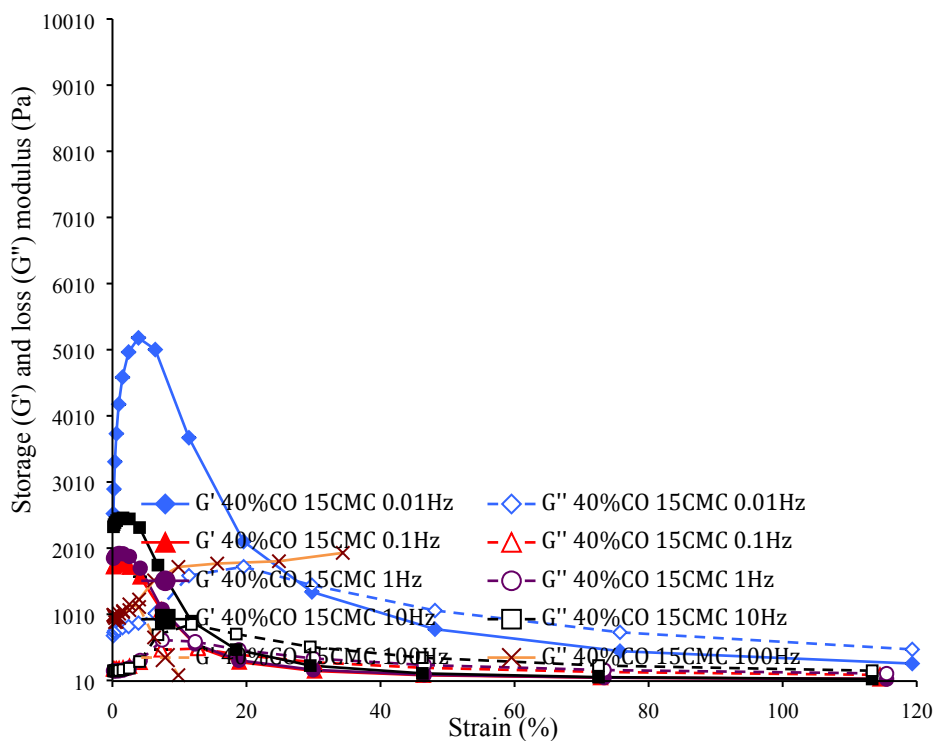

**Figure S1.** Strain sweep viscoelastic behaviour of 40% canola oil-in-water nanoemulsions stabilized with 15 CMC SDS at different constant frequencies (0.01 – 100 Hz). These experiments were done on all nanoemulsions to find the frequency independent regions for strain sweep viscoelasticity. In this specific case, no significant change in viscoelastic behaviour was observed when frequency was ranged from 0.1 – 10 Hz. Based on this, in all subsequent experiments a constant frequency of 1 Hz was used.

Figure S2

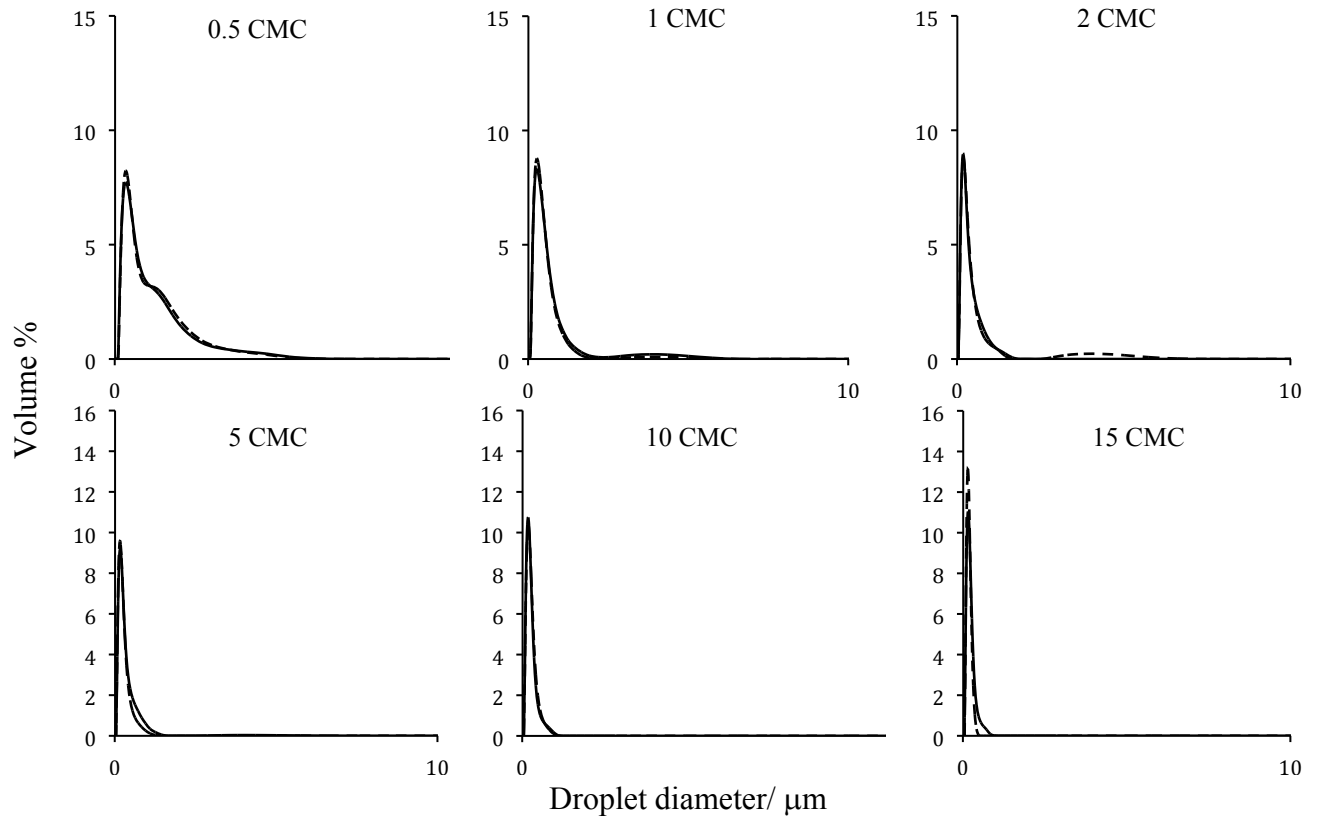

**Figure S2.** Droplet size distribution of nanoemulsions prepared with different concentration of SDS (expressed as multiples of SDS CMC). Data for fresh nanoemulsions (solid line) and after 90 days storage (dashed line) at room temperature are shown for comparison.

Figure S3

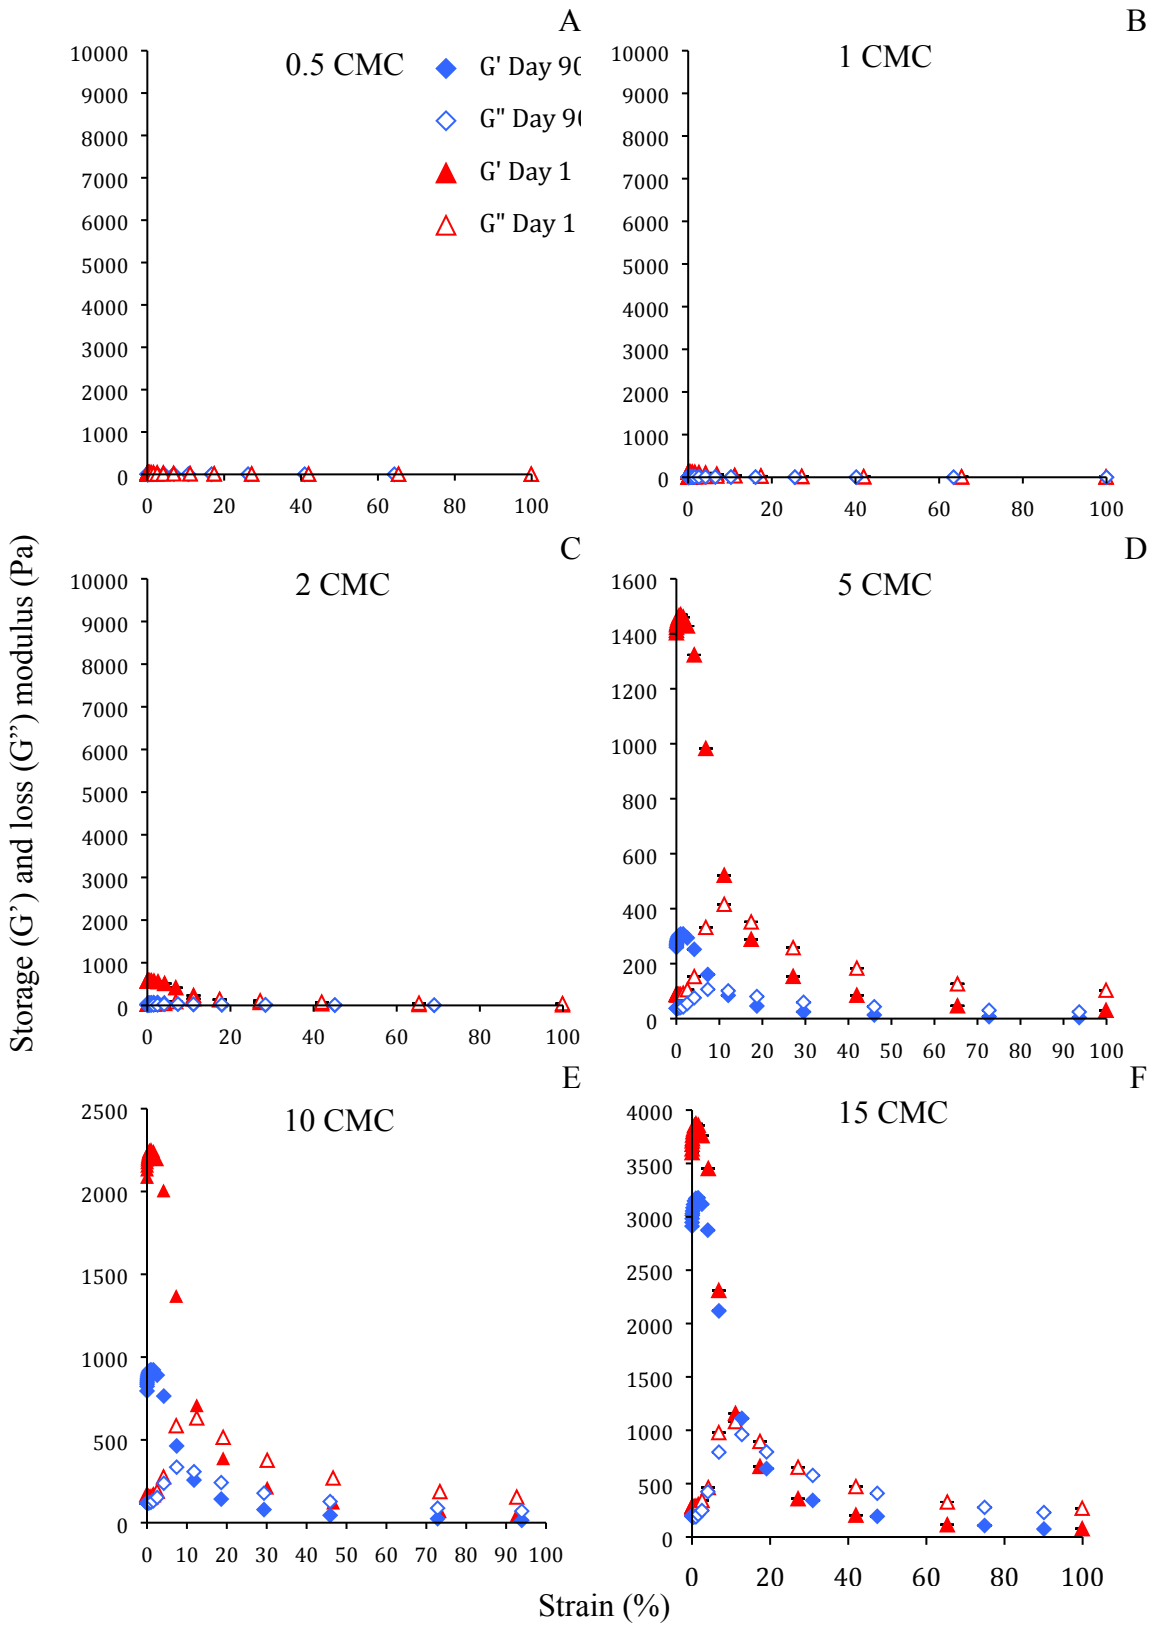

**Figure S3.** Strain sweep rheology of nanogel on Day 1 (red triangles) and Day 90 (blue diamonds). Data for repulsive nanogels with 0.5, 1, 2 CMC SDS and attractive nanogels with 5, 10 and 15 CMC SDS are shown. Storage moduli ( $G'$ ) are denoted with close symbols, while loss moduli ( $G''$ ) are shown with open symbols.

Figure S4

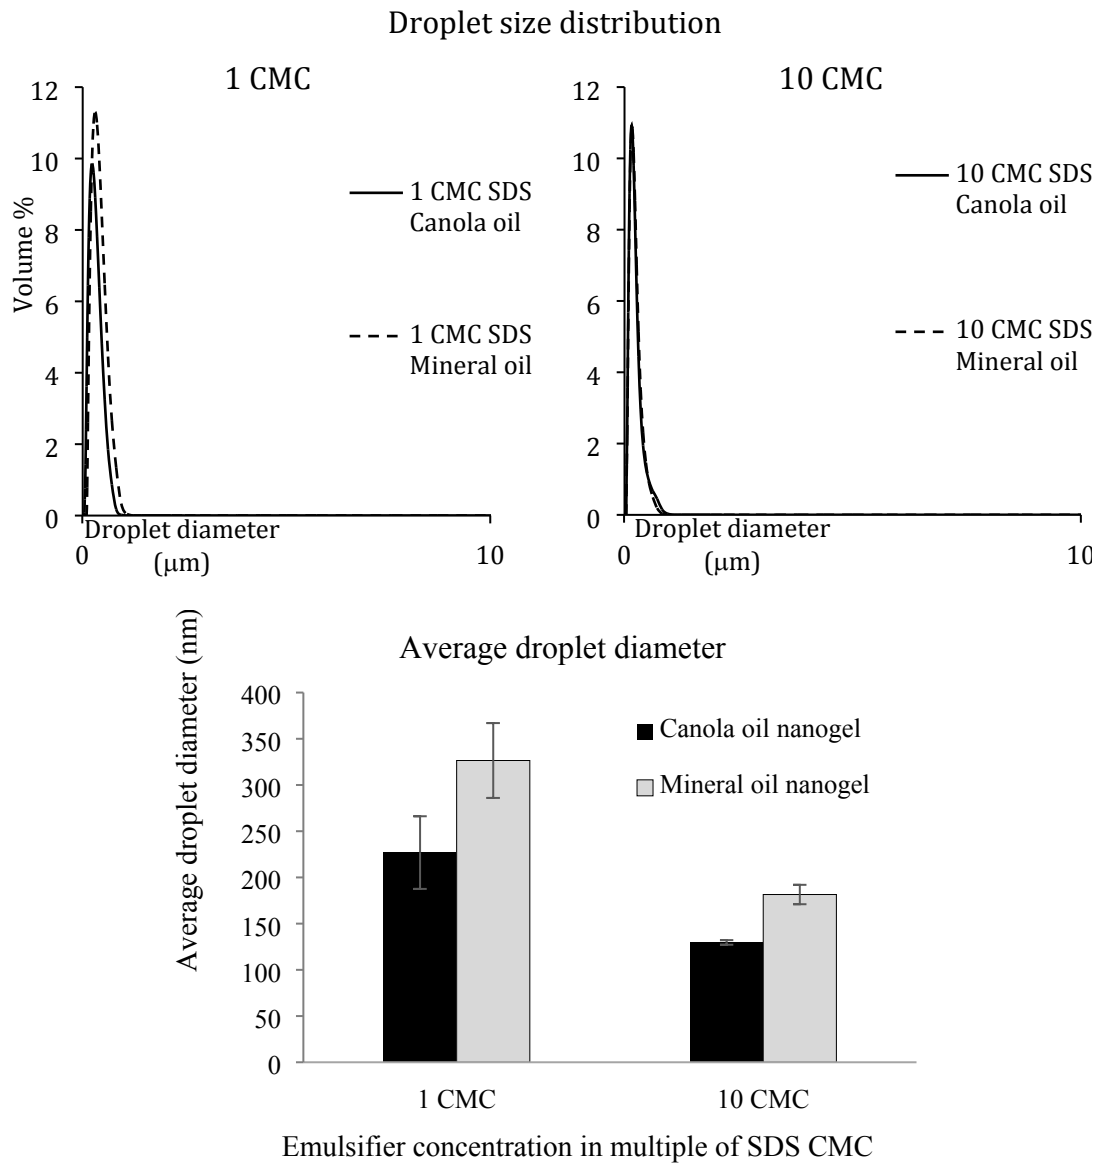

**Figure S4.** Droplet size distribution and average droplet diameter ( $d_{32}$ ) of canola oil and mineral oil nanogels made with 1 and 10 CMC SDS.
